# Supplementary material for: Characterizing Functional Connectivity Gradients for the Hippocampus-Amygdala Complex in Healthy and Psychiatric Cohorts
Source: Research Square preprint supplement (doi:10.21203/rs.3.rs-7032613/v1), 2025-09-03
Supplement: Supplementary file 1 [file fff6ff594239c957ec6d6752.docx]

# **Characterizing Functional Connectivity Gradients for the Hippocampus-Amygdala Complex in Healthy and Psychiatric Cohorts**

***Supplementary Material***

**Table S1.** Sample characteristics for HBS and MIND-Set

|  | **Sample size** | **Age** | **Gender** | **Anxiety Sensitivity** | **Depressive Level** | **Comorbidity** |
| --- | --- | --- | --- | --- | --- | --- |
| **HBS** | 410 | 33.8 ± 2.8 | 169 Males | 10.9 ± 6.9 | 4.4 ± 3.3 | -- |
| **MIND-Set** | 367 | 37.6 ± 14.0 | 202 Males | 12.7 ± 9.0 | 25.5 ± 16.6 | 1.6 ± 1.2 |
| **Difference** | -- | *t* = -4.72,  *p* < .001 | Chi-suqare = 17.69,  *p* < .001 | *t* = -2.80,  *p* = .005 | *t* = -22.50,  *p* < .001 | -- |

In MIND-Set, 286 participants were psychiatric patients: Mood Disorder = 225, Anxiety Disorder (including

Obsessive Compulsive Disorders (OCD) and PTSD) = 80, Attention-Deficit/Hyperactivity Disorder (ADHD) = 110,

Autism Spectrum Disorder (ASD) = 91, Addiction = 75.

**Table S2.** Neurotransmitter templates included from JuSpace

|  | **Template** | **Reference** |
| --- | --- | --- |
| **5HT 1A receptor** | WAY_HC36 | 1  https://identifiers.org/neurovault.collection:1206 |
| **5HT 1B receptor** | P943_HC22 | 1  https://identifiers.org/neurovault.collection:1206 |
| **5HT 2A receptor** | ALT_HC19 | 1  https://identifiers.org/neurovault.collection:1206 |
| **5HT 4 receptor** | sb20_hc59_beliveau | 2 |
| **5HT transporter** | DASB_HC30 | 1  https://identifiers.org/neurovault.collection:1206 |
| **5HT transporter** | MADAM_c11 | 3 |
| **Dopamine type 1 receptor** | SCH23390_c11 | 4 |
| **Dopamine type 2 receptor** | RACLOPRIDE_c11 | 5 |
| **Dopamine transporter** | DATSPECT | 6 |
| **F-Dopa** | FDOPA_f18 | 7 |
| **GABAA receptor** | FLUMAZENIL_c11 | 6 |
| **Kappa-opioid receptor** | KappaOp_LY2795050_10m_ShokriKojori | 8 |
| **Mu-opioid receptor** | CARFENTANIL_c11 | 9  https://identifiers.org/neurovault.image:303255 |
| **Metabotropic glutamate receptor 5** | abp_hc28_dubois | 10 |
| **Cannabinoid receptor 1** | FMPEPd2_hc22_laurikainen | 11 |
| **Noradrenaline transporter** | MRB_c11 | 12 |
| **NMDA receptor** | ge179_29hc_galovic2021 | 13 |
| **Vesicular acetylcholine transporter** | feobv_hc4_tuominen | 14 |

**Table S3.** The proportions of participants whose spatial correlation with group-average gradients higher than 0.5.

|  |  | **Resting-State1_Left** | **Resting-State1_Right** | **Resting-State2_Left** | **Resting-State2_Right** | **Resting-State3_Left** | **Resting-State3_Right** |
| --- | --- | --- | --- | --- | --- | --- | --- |
| **HBS** | **Zeroth-order** | 99.727% | 99.724% | 100.000% | 99.656% | 100.000% | 98.958% |
| **First-order** | 99.454% | 99.724% | 99.308% | 98.969% | 98.592% | 97.917% |
| **Second-order** | 96.721% | 94.751% | 96.540% | 92.440% | 94.014% | 90.972% |
| **Third-order** | 93.716% | 95.580% | 95.502% | 93.814% | 93.662% | 93.403% |
| **Fourth-order** | 86.339% | 80.939% | 86.159% | 79.381% | 80.986% | 77.083% |
| **Fifth-order** | 58.470% | 55.801% | 53.633% | 53.608% | 53.873% | 50.000% |
| **MIND-Set** | **Zeroth-order** | 98.638% | 98.093% | 99.454% | 98.093% | 99.725% | 98.630% |
| **First-order** | 96.458% | 95.913% | 95.902% | 93.733% | 97.802% | 95.068% |
| **Second-order** | 91.826% | 87.738% | 89.344% | 75.749% | 91.758% | 82.192% |
|  | **Third-order** | 87.738% | 83.651% | 86.066% | 78.202% | 92.308% | 82.740% |
| **Fourth-order** | 70.845% | 75.477% | 69.945% | 8.719% | 75.549% | 73.699% |
| **Fifth-order** | 22.343% | 5.177% | 9.016% | 6.267% | 5.220% | 4.658% |

**Table S4**. Correlations coefficients (Fisher r-to-z transformed, absolute values) between

gradient and neurotransmitter layouts

|  |  | **HBS**  **Resting-State1** | **HBS**  **Resting-State2** | **HBS**  **Resting-State3** | **MIND-Set**  **Resting-State1** | **MIND-Set**  **Resting-State2** | **MIND-Set**  **Resting-State3** |
| --- | --- | --- | --- | --- | --- | --- | --- |
| **Zeroth-order gradient_Left** | 5HT1A | 1.049 | 1.033 | 1.041 | 0.903 | 0.896 | 0.901 |
| 5HT1B | 0.311 | 0.318 | 0.317 | 0.369 | 0.374 | 0.372 |
| 5HT2A | 0.057 | 0.055 | 0.061 | 0.018 | 0.022 | 0.026 |
| 5HT4 | 0.877 | 0.869 | 0.880 | 0.799 | 0.802 | 0.806 |
| CB1 | 0.727 | 0.727 | 0.732 | 0.696 | 0.699 | 0.703 |
| D1 | 0.211 | 0.215 | 0.218 | 0.243 | 0.251 | 0.252 |
| D2 | 0.813 | 0.798 | 0.804 | 0.699 | 0.692 | 0.694 |
| DAT | 0.100 | 0.112 | 0.104 | 0.179 | 0.180 | 0.180 |
| FDOPA | 0.459 | 0.466 | 0.468 | 0.504 | 0.512 | 0.514 |
| GABAa | 0.568 | 0.558 | 0.567 | 0.475 | 0.475 | 0.478 |
| KappaOp | 0.728 | 0.733 | 0.733 | 0.809 | 0.817 | 0.810 |
| mGluR5 | 0.622 | 0.611 | 0.622 | 0.532 | 0.532 | 0.535 |
| MU | 0.383 | 0.387 | 0.387 | 0.454 | 0.461 | 0.455 |
| NA | 0.009 | 0.013 | 0.008 | 0.043 | 0.040 | 0.039 |
| NMDA | 0.152 | 0.157 | 0.149 | 0.178 | 0.173 | 0.172 |
| SERT_DAS | 0.688 | 0.695 | 0.687 | 0.745 | 0.742 | 0.737 |
| SERT_MADAM | 0.506 | 0.514 | 0.510 | 0.588 | 0.591 | 0.586 |
| VACh | 0.350 | 0.339 | 0.344 | 0.260 | 0.255 | 0.258 |
| **Zeroth-order gradient_Right** | 5HT1A | 1.053 | 1.044 | 1.040 | 0.792 | 0.716 | 0.760 |
| 5HT1B | 0.118 | 0.120 | 0.119 | 0.227 | 0.255 | 0.244 |
| 5HT2A | 0.050 | 0.052 | 0.053 | 0.098 | 0.121 | 0.110 |
| 5HT4 | 0.619 | 0.612 | 0.613 | 0.476 | 0.420 | 0.449 |
| CB1 | 0.478 | 0.475 | 0.473 | 0.415 | 0.382 | 0.403 |
| D1 | 0.037 | 0.036 | 0.039 | 0.088 | 0.094 | 0.087 |
| D2 | 0.498 | 0.498 | 0.494 | 0.358 | 0.322 | 0.342 |
| DAT | 0.000 | 0.000 | 0.005 | 0.134 | 0.171 | 0.147 |
| FDOPA | 0.652 | 0.655 | 0.653 | 0.730 | 0.739 | 0.736 |
| GABAa | 0.349 | 0.347 | 0.341 | 0.190 | 0.139 | 0.172 |
| KappaOp | 1.015 | 1.025 | 1.019 | 1.179 | 1.224 | 1.215 |
| mGluR5 | 0.511 | 0.509 | 0.502 | 0.343 | 0.290 | 0.324 |
| MU | 0.470 | 0.479 | 0.473 | 0.597 | 0.643 | 0.628 |
| NA | 0.259 | 0.252 | 0.263 | 0.275 | 0.273 | 0.265 |
| NMDA | 0.501 | 0.505 | 0.505 | 0.601 | 0.641 | 0.619 |
| SERT_DAS | 0.721 | 0.730 | 0.724 | 0.866 | 0.917 | 0.905 |
| SERT_MADAM | 0.908 | 0.919 | 0.909 | 1.050 | 1.097 | 1.095 |
| VACh | 0.522 | 0.519 | 0.516 | 0.354 | 0.307 | 0.333 |
| **First-order gradient_Left** | 5HT1A | 0.617 | 0.570 | 0.574 | 0.038 | 0.043 | 0.066 |
| 5HT1B | 0.416 | 0.436 | 0.427 | 0.709 | 0.713 | 0.737 |
| 5HT2A | 0.172 | 0.218 | 0.202 | 0.389 | 0.381 | 0.367 |
| 5HT4 | 0.541 | 0.483 | 0.497 | 0.066 | 0.070 | 0.064 |
| CB1 | 0.386 | 0.356 | 0.357 | 0.095 | 0.096 | 0.098 |
| D1 | 0.107 | 0.084 | 0.094 | 0.226 | 0.240 | 0.261 |
| D2 | 0.613 | 0.565 | 0.575 | 0.040 | 0.045 | 0.074 |
| DAT | 0.074 | 0.029 | 0.057 | 0.309 | 0.306 | 0.319 |
| FDOPA | 0.199 | 0.185 | 0.186 | 0.281 | 0.290 | 0.311 |
| GABAa | 0.426 | 0.368 | 0.388 | 0.123 | 0.122 | 0.133 |
| KappaOp | 0.992 | 1.008 | 1.002 | 1.210 | 1.213 | 1.234 |
| mGluR5 | 0.485 | 0.423 | 0.445 | 0.055 | 0.054 | 0.063 |
| MU | 0.740 | 0.759 | 0.761 | 1.291 | 1.306 | 1.355 |
| NA | 0.099 | 0.074 | 0.093 | 0.027 | 0.026 | 0.014 |
| NMDA | 0.016 | 0.055 | 0.028 | 0.074 | 0.062 | 0.050 |
| SERT_DAS | 0.801 | 0.863 | 0.825 | 0.816 | 0.797 | 0.783 |
| SERT_MADAM | 0.804 | 0.860 | 0.835 | 1.338 | 1.326 | 1.352 |
| VACh | 0.209 | 0.168 | 0.181 | 0.370 | 0.376 | 0.404 |
| **First-order gradient_Right** | 5HT1A | 0.446 | 0.381 | 0.408 | 0.738 | 0.875 | 0.849 |
| 5HT1B | 0.338 | 0.338 | 0.355 | 0.716 | 0.689 | 0.707 |
| 5HT2A | 0.145 | 0.172 | 0.154 | 0.255 | 0.249 | 0.245 |
| 5HT4 | 0.192 | 0.122 | 0.160 | 0.669 | 0.754 | 0.730 |
| CB1 | 0.199 | 0.163 | 0.186 | 0.282 | 0.322 | 0.308 |
| D1 | 0.047 | 0.001 | 0.044 | 0.240 | 0.231 | 0.236 |
| D2 | 0.278 | 0.257 | 0.254 | 0.644 | 0.715 | 0.721 |
| DAT | 0.094 | 0.104 | 0.079 | 0.587 | 0.601 | 0.601 |
| FDOPA | 0.504 | 0.457 | 0.501 | 0.254 | 0.193 | 0.211 |
| GABAa | 0.182 | 0.167 | 0.161 | 0.790 | 0.850 | 0.832 |
| KappaOp | 1.371 | 1.235 | 1.353 | 0.447 | 0.338 | 0.360 |
| mGluR5 | 0.311 | 0.284 | 0.285 | 0.728 | 0.811 | 0.787 |
| MU | 1.178 | 1.191 | 1.213 | 0.864 | 0.743 | 0.772 |
| NA | 0.059 | 0.131 | 0.080 | 0.115 | 0.140 | 0.143 |
| NMDA | 0.441 | 0.441 | 0.449 | 0.352 | 0.303 | 0.298 |
| SERT_DAS | 0.940 | 0.967 | 0.966 | 0.565 | 0.478 | 0.497 |
| SERT_MADAM | 1.356 | 1.343 | 1.378 | 0.503 | 0.401 | 0.425 |
| VACh | 0.256 | 0.221 | 0.226 | 0.829 | 0.930 | 0.923 |
| **Second-order gradient_Left** | 5HT1A | 0.187 | 0.330 | 0.319 | 0.223 | 0.265 | 0.205 |
|  | 5HT1B | 0.446 | 0.506 | 0.479 | 0.389 | 0.405 | 0.318 |
|  | 5HT2A | 0.612 | 0.511 | 0.545 | 0.821 | 0.791 | 0.876 |
|  | 5HT4 | 0.465 | 0.320 | 0.335 | 0.447 | 0.406 | 0.451 |
|  | CB1 | 0.403 | 0.326 | 0.327 | 0.380 | 0.356 | 0.359 |
|  | D1 | 1.948 ** | 1.799 * | 1.813 * | 1.586 * | 1.568 * | 1.417 * |
|  | D2 | 0.282 | 0.441 | 0.426 | 0.320 | 0.367 | 0.290 |
|  | DAT | 0.054 | 0.184 | 0.142 | 0.153 | 0.128 | 0.227 |
|  | FDOPA | 1.061 | 1.053 | 1.033 | 0.875 | 0.872 | 0.794 |
|  | GABAa | 0.147 | 0.002 | 0.026 | 0.256 | 0.219 | 0.294 |
|  | KappaOp | 0.404 | 0.401 | 0.384 | 0.293 | 0.302 | 0.230 |
|  | mGluR5 | 0.231 | 0.078 | 0.105 | 0.328 | 0.290 | 0.362 |
|  | MU | 0.518 | 0.546 | 0.530 | 0.440 | 0.462 | 0.373 |
|  | NA | 0.174 | 0.112 | 0.141 | 0.455 | 0.457 | 0.491 |
|  | NMDA | 0.806 | 0.692 | 0.738 | 1.211 | 1.177 | 1.296 |
|  | SERT_DAS | 0.378 | 0.342 | 0.374 | 0.537 | 0.523 | 0.613 |
|  | SERT_MADAM | 0.138 | 0.190 | 0.162 | 0.027 | 0.047 | 0.045 |
|  | VACh | 0.368 | 0.538 | 0.503 | 0.303 | 0.344 | 0.240 |
| **Second-order gradient_Right** | 5HT1A | 0.468 | 0.462 | 0.383 | 1.146 | 0.917 | 1.469 |
|  | 5HT1B | 0.388 | 0.407 | 0.398 | 0.145 | 0.846 | 0.008 |
|  | 5HT2A | 0.508 | 0.452 | 0.504 | 0.531 | 0.193 | 0.357 |
|  | 5HT4 | 0.024 | 0.009 | 0.079 | 1.354 | 0.366 | 1.205 |
|  | CB1 | 0.011 | 0.004 | 0.044 | 0.815 | 0.022 | 0.685 |
|  | D1 | 1.165 | 1.125 | 1.196 | 0.428 | 0.531 | 0.218 |
|  | D2 | 0.542 | 0.543 | 0.491 | 0.437 | 1.579 | 0.643 |
|  | DAT | 0.262 | 0.298 | 0.253 | 0.445 | 0.594 | 0.510 |
|  | FDOPA | 0.320 | 0.333 | 0.370 | 0.655 | 0.278 | 0.521 |
|  | GABAa | 0.310 | 0.348 | 0.279 | 0.973 | 0.485 | 0.986 |
|  | KappaOp | 0.161 | 0.197 | 0.236 | 0.812 | 0.018 | 0.777 |
|  | mGluR5 | 0.317 | 0.345 | 0.270 | 1.195 | 0.532 | 1.245 |
|  | MU | 0.260 | 0.291 | 0.307 | 0.430 | 0.314 | 0.376 |
|  | NA | 0.031 | 0.075 | 0.069 | 0.097 | 0.379 | 0.020 |
|  | NMDA | 0.356 | 0.299 | 0.321 | 0.217 | 0.315 | 0.065 |
|  | SERT_DAS | 0.315 | 0.265 | 0.266 | 0.180 | 0.086 | 0.236 |
|  | SERT_MADAM | 0.155 | 0.115 | 0.094 | 0.532 | 0.076 | 0.551 |
|  | VACh | 0.489 | 0.495 | 0.430 | 0.629 | 1.435 | 0.843 |
| **Third-order gradient_Left** | 5HT1A | 1.444* (FDR) | 1.545* (FDR) | 1.543* (FDR) | 1.955 ** | 1.955 ** | 1.948 ** |
| 5HT1B | 0.064 | 0.045 | 0.058 | 0.039 | 0.037 | 0.044 |
| 5HT2A | 0.138 | 0.223 | 0.217 | 0.224 | 0.228 | 0.217 |
| 5HT4 | 1.015 | 1.168 | 1.161 | 1.121 | 1.127 | 1.107 |
| CB1 | 0.691 | 0.727 | 0.737 | 0.646 | 0.649 | 0.634 |
| D1 | 0.114 | 0.161 | 0.159 | 0.035 | 0.037 | 0.028 |
| D2 | 1.206 | 1.290 | 1.270 | 1.708 * | 1.703 * | 1.732 * |
| DAT | 0.123 | 0.231 | 0.213 | 0.434 | 0.436 | 0.439 |
| FDOPA | 0.251 | 0.268 | 0.273 | 0.121 | 0.123 | 0.113 |
| GABAa | 0.763 | 0.914 | 0.901 | 1.135 | 1.143 | 1.129 |
| KappaOp | 0.376 | 0.369 | 0.380 | 0.301 | 0.301 | 0.299 |
| mGluR5 | 0.793 | 0.957 | 0.942 | 1.162 | 1.170 | 1.156 |
| MU | 0.086 | 0.092 | 0.099 | 0.040 | 0.040 | 0.039 |
| NA | 0.093 | 0.001 | 0.005 | 0.137 | 0.141 | 0.136 |
| NMDA | 0.078 | 0.030 | 0.016 | 0.082 | 0.086 | 0.079 |
| SERT_DAS | 0.386 | 0.301 | 0.321 | 0.275 | 0.272 | 0.276 |
| SERT_MADAM | 0.187 | 0.139 | 0.156 | 0.071 | 0.070 | 0.069 |
| VACh | 0.621 | 0.692 | 0.676 | 0.917 | 0.916 | 0.925 |
| **Third-order gradient_Right** | 5HT1A | 1.514 * | 1.558 * | 1.615 * | 1.838 ** | 1.703 | 1.507* |
| 5HT1B | 0.043 | 0.060 | 0.072 | 0.247 | 0.080 | 0.403 |
| 5HT2A | 0.154 | 0.153 | 0.123 | 0.034 | 0.258 | 0.112 |
| 5HT4 | 1.044 | 1.040 | 1.012 | 0.823 | 1.071 | 0.607 |
| CB1 | 0.571 | 0.559 | 0.548 | 0.416 | 0.623 | 0.253 |
| D1 | 0.114 | 0.100 | 0.061 | 0.165 | 0.057 | 0.367 |
| D2 | 0.625 | 0.657 | 0.675 | 1.020 | 0.784 | 1.250 |
| DAT | 0.257 | 0.288 | 0.289 | 0.542 | 0.582 | 0.574 |
| FDOPA | 0.445 | 0.435 | 0.413 | 0.228 | 0.409 | 0.055 |
| GABAa | 0.628 | 0.652 | 0.652 | 0.828 | 1.063 | 0.716 |
| KappaOp | 0.670 | 0.676 | 0.658 | 0.539 | 0.674 | 0.380 |
| mGluR5 | 0.808 | 0.838 | 0.839 | 1.026 | 1.341 | 0.861 |
| MU | 0.206 | 0.216 | 0.202 | 0.174 | 0.305 | 0.063 |
| NA | 0.334 | 0.313 | 0.319 | 0.156 | 0.039 | 0.204 |
| NMDA | 0.147 | 0.146 | 0.164 | 0.188 | 0.005 | 0.293 |
| SERT_DAS | 0.273 | 0.274 | 0.289 | 0.279 | 0.262 | 0.251 |
| SERT_MADAM | 0.480 | 0.485 | 0.490 | 0.460 | 0.539 | 0.358 |
| VACh | 0.797 | 0.834 | 0.852 | 1.213 | 0.987 | 1.370 |
| **Fourth-order gradient_Left** | 5HT1A | 0.613 | 0.361 | 0.314 | 0.071 | 0.065 | 0.091 |
| 5HT1B | 0.278 | 0.271 | 0.310 | 0.436 | 0.428 | 0.466 |
| 5HT2A | 0.609 | 0.633 | 0.581 | 0.300 | 0.309 | 0.214 |
| 5HT4 | 0.598 | 0.439 | 0.359 | 0.113 | 0.101 | 0.183 |
| CB1 | 0.290 | 0.179 | 0.117 | 0.243 | 0.233 | 0.309 |
| D1 | 0.018 | 0.037 | 0.021 | 0.270 | 0.259 | 0.354 |
| D2 | 0.640 | 0.400 | 0.363 | 0.018 | 0.023 | 0.012 |
| DAT | 1.459* | 1.459 * | 1.456 * | 0.953 | 0.962 | 0.901 |
| FDOPA | 0.118 | 0.117 | 0.175 | 0.452 | 0.442 | 0.533 |
| GABAa | 1.191 | 0.908 | 0.818 | 0.286 | 0.297 | 0.229 |
| KappaOp | 0.114 | 0.165 | 0.209 | 0.493 | 0.491 | 0.508 |
| mGluR5 | 1.128 | 0.875 | 0.781 | 0.240 | 0.251 | 0.181 |
| MU | 0.169 | 0.149 | 0.180 | 0.352 | 0.351 | 0.363 |
| NA | 0.851 | 0.945 | 0.929 | 0.686 | 0.691 | 0.633 |
| NMDA | 0.605 | 0.752 | 0.698 | 0.444 | 0.458 | 0.361 |
| SERT_DAS | 0.317 | 0.463 | 0.472 | 0.558 | 0.564 | 0.499 |
| SERT_MADAM | 0.378 | 0.430 | 0.459 | 0.591 | 0.591 | 0.573 |
| VACh | 0.881 | 0.661 | 0.651 | 0.369 | 0.370 | 0.366 |
| **Fourth-order gradient_Right** | 5HT1A | 0.420 | 0.281 | 0.391 | 0.196 | 0.274 | 0.333 |
| 5HT1B | 0.322 | 0.328 | 0.297 | 0.384 | 0.227 | 0.335 |
| 5HT2A | 0.819 | 0.841 | 0.886 | 0.532 | 0.448 | 0.485 |
| 5HT4 | 0.623 | 0.508 | 0.630 | 0.015 | 0.053 | 0.096 |
| CB1 | 0.384 | 0.316 | 0.403 | 0.072 | 0.053 | 0.148 |
| D1 | 0.198 | 0.212 | 0.242 | 0.085 | 0.010 | 0.098 |
| D2 | 0.483 | 0.389 | 0.439 | 0.137 | 0.075 | 0.039 |
| DAT | 1.176 | 1.086 | 1.111 | 0.740 | 0.354 | 0.622 |
| FDOPA | 0.005 | 0.051 | 0.023 | 0.352 | 0.332 | 0.368 |
| GABAa | 1.271 | 1.055 | 1.236 | 0.421 | 0.303 | 0.288 |
| KappaOp | 0.095 | 0.191 | 0.103 | 0.549 | 0.797 | 0.570 |
| mGluR5 | 1.047 | 0.853 | 1.012 | 0.271 | 0.137 | 0.146 |
| MU | 0.120 | 0.172 | 0.127 | 0.315 | 0.563 | 0.280 |
| NA | 0.719 | 0.772 | 0.737 | 0.745 | 0.724 | 0.757 |
| NMDA | 0.781 | 0.862 | 0.824 | 0.802 | 0.687 | 0.765 |
| SERT_DAS | 0.532 | 0.635 | 0.558 | 0.874 | 0.702 | 0.851 |
| SERT_MADAM | 0.238 | 0.340 | 0.256 | 0.674 | 0.700 | 0.689 |
| VACh | 0.585 | 0.470 | 0.539 | 0.139 | 0.090 | 0.028 |
| **Fifth-order gradient_Left** | 5HT1A | 0.159 | 0.179 | 0.151 | 0.228 | 0.123 | 0.606 |
| 5HT1B | 0.846 | 0.771 | 0.826 | 0.820 | 0.507 | 0.187 |
| 5HT2A | 0.422 | 0.513 | 0.586 | 0.116 | 0.266 | 0.340 |
| 5HT4 | 0.370 | 0.404 | 0.440 | 0.254 | 0.069 | 0.465 |
| CB1 | 0.842 | 0.840 | 0.864 | 0.573 | 0.053 | 0.790 |
| D1 | 0.298 | 0.294 | 0.379 | 0.025 | 0.020 | 0.030 |
| D2 | 0.166 | 0.136 | 0.159 | 0.017 | 0.072 | 0.262 |
| DAT | 0.415 | 0.263 | 0.192 | 0.250 | 0.044 | 0.324 |
| FDOPA | 0.512 | 0.475 | 0.525 | 0.243 | 0.004 | 0.237 |
| GABAa | 0.208 | 0.299 | 0.349 | 0.222 | 0.027 | 0.343 |
| KappaOp | 0.180 | 0.139 | 0.182 | 0.399 | 0.386 | 0.003 |
| mGluR5 | 0.166 | 0.252 | 0.310 | 0.186 | 0.003 | 0.272 |
| MU | 0.040 | 0.015 | 0.082 | 0.264 | 0.499 | 0.295 |
| NA | 0.239 | 0.375 | 0.500 | 0.367 | 0.321 | 0.077 |
| NMDA | 0.069 | 0.174 | 0.312 | 0.055 | 0.260 | 0.380 |
| SERT_DAS | 0.293 | 0.209 | 0.156 | 0.665 | 0.308 | 0.358 |
| SERT_MADAM | 0.407 | 0.327 | 0.334 | 0.696 | 0.489 | 0.126 |
| VACh | 0.399 | 0.320 | 0.332 | 0.259 | 0.258 | 0.120 |
| **Fifth-order gradient_Right** | 5HT1A | 0.107 | 0.053 | 0.044 | 0.577 | 0.592 | 0.542 |
| 5HT1B | 1.134 | 0.984 | 1.079 | 0.066 | 0.223 | 0.032 |
| 5HT2A | 0.351 | 0.442 | 0.299 | 0.225 | 0.291 | 0.171 |
| 5HT4 | 0.223 | 0.403 | 0.249 | 0.602 | 0.333 | 0.522 |
| CB1 | 0.798 | 0.993 | 0.832 | 0.692 | 0.438 | 0.691 |
| D1 | 0.626 | 0.681 | 0.537 | 0.049 | 0.170 | 0.126 |
| D2 | 0.868 | 0.674 | 0.805 | 0.156 | 0.071 | 0.122 |
| DAT | 0.800 | 0.674 | 0.806 | 0.064 | 0.477 | 0.086 |
| FDOPA | 0.679 | 0.747 | 0.661 | 0.075 | 0.325 | 0.066 |
| GABAa | 0.047 | 0.075 | 0.025 | 0.453 | 0.011 | 0.441 |
| KappaOp | 0.091 | 0.136 | 0.088 | 0.281 | 0.310 | 0.283 |
| mGluR5 | 0.072 | 0.060 | 0.043 | 0.407 | 0.103 | 0.393 |
| MU | 0.004 | 0.037 | 0.035 | 0.755 | 0.059 | 0.712 |
| NA | 0.164 | 0.106 | 0.120 | 0.161 | 0.589 | 0.086 |
| NMDA | 0.242 | 0.263 | 0.206 | 0.090 | 0.556 | 0.052 |
| SERT_DAS | 0.233 | 0.195 | 0.271 | 0.115 | 0.634 | 0.029 |
| SERT_MADAM | 0.227 | 0.226 | 0.251 | 0.171 | 0.485 | 0.110 |
| VACh | 0.787 | 0.576 | 0.718 | 0.215 | 0.102 | 0.172 |

* *p*<0.05, ***p*<0.01.

**Table S5**. Correlations coefficients between gradient and neurotransmitter layouts

separately for patients and healthy controls in MIND-Set (data is from resting-state 1)

|  |  | **Patient_Left** | **Patient_Right** | **Healthy Control_Left** | **Healthy Control_Right** |
| --- | --- | --- | --- | --- | --- |
| **Zeroth-order gradient** | 5HT1A | 0.893 | 0.802 | 0.974 | 0.774 |
| 5HT1B | 0.373 | 0.224 | 0.340 | 0.236 |
| 5HT2A | 0.017 | 0.094 | 0.037 | 0.096 |
| 5HT4 | 0.794 | 0.482 | 0.843 | 0.468 |
| CB1 | 0.695 | 0.418 | 0.711 | 0.411 |
| D1 | 0.247 | 0.088 | 0.231 | 0.098 |
| D2 | 0.689 | 0.364 | 0.759 | 0.347 |
| DAT | 0.186 | 0.126 | 0.134 | 0.142 |
| FDOPA | 0.509 | 0.729 | 0.481 | 0.740 |
| GABAa | 0.469 | 0.198 | 0.524 | 0.181 |
| KappaOp | 0.814 | 1.181 | 0.772 | 1.198 |
| mGluR5 | 0.526 | 0.352 | 0.581 | 0.333 |
| MU | 0.458 | 0.598 | 0.423 | 0.611 |
| NA | 0.045 | 0.271 | 0.027 | 0.272 |
| NMDA | 0.179 | 0.596 | 0.158 | 0.604 |
| SERT_DAS | 0.747 | 0.862 | 0.713 | 0.872 |
| SERT_MADAM | 0.593 | 1.051 | 0.548 | 1.060 |
| VACh | 0.253 | 0.361 | 0.306 | 0.342 |
| **First-order gradient** | 5HT1A | 0.074 | 0.713 | 0.249 | 0.694 |
| 5HT1B | 0.729 | 0.691 | 0.601 | 0.747 |
| 5HT2A | 0.384 | 0.265 | 0.288 | 0.235 |
| 5HT4 | 0.049 | 0.664 | 0.296 | 0.626 |
| CB1 | 0.086 | 0.294 | 0.240 | 0.246 |
| D1 | 0.248 | 0.229 | 0.199 | 0.253 |
| D2 | 0.079 | 0.606 | 0.248 | 0.637 |
| DAT | 0.332 | 0.561 | 0.121 | 0.570 |
| FDOPA | 0.299 | 0.251 | 0.268 | 0.285 |
| GABAa | 0.149 | 0.778 | 0.137 | 0.735 |
| KappaOp | 1.210 | 0.469 | 1.242 | 0.484 |
| mGluR5 | 0.080 | 0.711 | 0.202 | 0.673 |
| MU | 1.327 | 0.896 | 1.099 | 0.914 |
| NA | 0.031 | 0.108 | 0.043 | 0.140 |
| NMDA | 0.067 | 0.369 | 0.025 | 0.341 |
| SERT_DAS | 0.791 | 0.575 | 0.843 | 0.594 |
| SERT_MADAM | 1.351 | 0.518 | 1.130 | 0.545 |
| VACh | 0.410 | 0.782 | 0.099 | 0.809 |
| **Second-order gradient** | 5HT1A | 0.195 | 0.712 | 0.283 | 1.654 |
| 5HT1B | 0.362 | 0.349 | 0.376 | 0.063 |
| 5HT2A | 0.859 | 0.745 | 0.793 | 0.240 |
| 5HT4 | 0.470 | 1.166 | 0.381 | 1.058 |
| CB1 | 0.386 | 0.872 | 0.326 | 0.605 |
| D1 | 1.502 * | 0.736 | 1.467 * (FDR) | 0.070 |
| D2 | 0.287 | 0.163 | 0.376 | 0.753 |
| DAT | 0.202 | 0.331 | 0.155 | 0.545 |
| FDOPA | 0.839 | 0.826 | 0.821 | 0.426 |
| GABAa | 0.297 | 0.803 | 0.213 | 0.987 |
| KappaOp | 0.275 | 0.849 | 0.267 | 0.715 |
| mGluR5 | 0.369 | 0.934 | 0.282 | 1.253 |
| MU | 0.417 | 0.563 | 0.434 | 0.334 |
| NA | 0.493 | 0.243 | 0.470 | 0.002 |
| NMDA | 1.286 | 0.387 | 1.211 | 0.011 |
| SERT_DAS | 0.560 | 0.139 | 0.563 | 0.281 |
| SERT_MADAM | 0.001 | 0.522 | 0.015 | 0.563 |
| VACh | 0.259 | 0.333 | 0.334 | 0.958 |
| **Third-order gradient** | 5HT1A | 1.959 ** | 1.925 ** | 1.874 ** | 1.264 |
| 5HT1B | 0.040 | 0.181 | 0.005 | 0.587 |
| 5HT2A | 0.213 | 0.083 | 0.231 | 0.137 |
| 5HT4 | 1.104 | 0.911 | 1.163 | 0.537 |
| CB1 | 0.638 | 0.485 | 0.690 | 0.140 |
| D1 | 0.026 | 0.092 | 0.078 | 0.404 |
| D2 | 1.721 * | 0.913 | 1.560* (FDR) | 1.457 |
| DAT | 0.427 | 0.501 | 0.363 | 0.562 |
| FDOPA | 0.115 | 0.295 | 0.174 | 0.077 |
| GABAa | 1.117 | 0.846 | 1.077 | 0.600 |
| KappaOp | 0.301 | 0.590 | 0.330 | 0.203 |
| mGluR5 | 1.143 | 1.060 | 1.110 | 0.698 |
| MU | 0.039 | 0.203 | 0.060 | 0.123 |
| NA | 0.129 | 0.152 | 0.098 | 0.347 |
| NMDA | 0.071 | 0.152 | 0.063 | 0.315 |
| SERT_DAS | 0.283 | 0.290 | 0.292 | 0.079 |
| SERT_MADAM | 0.075 | 0.493 | 0.100 | 0.142 |
| VACh | 0.916 | 1.111 | 0.840 | 1.494 |
| **Fourth-order gradient** | 5HT1A | 0.051 | 0.125 | 0.107 | 0.257 |
|  | 5HT1B | 0.446 | 0.403 | 0.441 | 0.346 |
|  | 5HT2A | 0.294 | 0.539 | 0.363 | 0.630 |
|  | 5HT4 | 0.110 | 0.060 | 0.041 | 0.034 |
|  | CB1 | 0.237 | 0.052 | 0.127 | 0.070 |
|  | D1 | 0.294 | 0.075 | 0.260 | 0.220 |
|  | D2 | 0.036 | 0.205 | 0.187 | 0.064 |
|  | DAT | 0.954 | 0.849 | 1.165 | 0.641 |
|  | FDOPA | 0.470 | 0.326 | 0.418 | 0.317 |
|  | GABAa | 0.296 | 0.494 | 0.468 | 0.349 |
|  | KappaOp | 0.506 | 0.469 | 0.416 | 0.567 |
|  | mGluR5 | 0.246 | 0.347 | 0.417 | 0.203 |
|  | MU | 0.373 | 0.259 | 0.334 | 0.342 |
|  | NA | 0.678 | 0.770 | 0.755 | 0.637 |
|  | NMDA | 0.421 | 0.782 | 0.459 | 0.897 |
|  | SERT_DAS | 0.541 | 0.813 | 0.487 | 1.071 |
|  | SERT_MADAM | 0.596 | 0.595 | 0.562 | 0.792 |
|  | VACh | 0.388 | 0.213 | 0.532 | 0.075 |
| **Fifth-order gradient** | 5HT1A | 0.537 | 0.505 | 0.288 | 0.318 |
|  | 5HT1B | 0.127 | 0.138 | 0.818 | 0.105 |
|  | 5HT2A | 0.354 | 0.361 | 0.242 | 0.494 |
|  | 5HT4 | 0.403 | 0.646 | 0.342 | 0.647 |
|  | CB1 | 0.712 | 0.633 | 0.765 | 0.306 |
|  | D1 | 0.051 | 0.073 | 0.086 | 0.567 |
|  | D2 | 0.217 | 0.163 | 0.025 | 0.133 |
|  | DAT | 0.318 | 0.004 | 0.347 | 0.049 |
|  | FDOPA | 0.197 | 0.043 | 0.346 | 0.154 |
|  | GABAa | 0.301 | 0.448 | 0.257 | 0.206 |
|  | KappaOp | 0.111 | 0.342 | 0.368 | 0.033 |
|  | mGluR5 | 0.225 | 0.388 | 0.210 | 0.212 |
|  | MU | 0.402 | 0.843 | 0.187 | 0.328 |
|  | NA | 0.099 | 0.181 | 0.306 | 0.470 |
|  | NMDA | 0.364 | 0.192 | 0.119 | 0.304 |
|  | SERT_DAS | 0.257 | 0.307 | 0.650 | 0.541 |
|  | SERT_MADAM | 0.027 | 0.330 | 0.658 | 0.363 |
|  | VACh | 0.113 | 0.230 | 0.262 | 0.235 |

* *p*<0.05, ***p*<0.01.

Table S6. Spearman correlations between gradient-neurotransmitter similarity and mental

health outcomes in HBS

|  |  | **Anxiety Sensitivity** | **Depressive Severity** | **Childhood**  **Trauma** | **Emotional**  **Neglect** | **Physical**  **Neglect** | **Emotional Abuse** | **Physical**  **Abuse** |
| --- | --- | --- | --- | --- | --- | --- | --- | --- |
| **5HT1A_ Resting-** | *rs* | 0.160 | 0.190 * | 0.130 | 0.100 | 0.120 | 0.100 | 0.140 |
| **State 1_Left** | *p* | 0.072 | 0.021 | 0.145 | 0.245 | 0.169 | 0.234 | 0.125 |
| **5HT1A_ Resting-** | *rs* | -0.130 | 0.050 | 0.030 | 0.010 | 0.060 | 0.000 | 0.070 |
| **State 1_Right** | *p* | 0.145 | 0.567 | 0.774 | 0.952 | 0.538 | 0.988 | 0.431 |
| N = 179 |  |  |  |  |  |  |  |  |
| **5HT1A_ Resting-** | *rs* | 0.080 | -0.020 | -0.040 | -0.060 | 0.020 | 0.030 | -0.060 |
| **State 2_Left** | *p* | 0.451 | 0.855 | 0.757 | 0.612 | 0.836 | 0.836 | 0.612 |
| **5HT1A_ Resting-** | *rs* | -0.060 | 0.020 | -0.060 | 0.010 | -0.070 | -0.100 | 0.000 |
| **State 2_Right** | *p* | 0.601 | 0.855 | 0.612 | 0.934 | 0.601 | 0.359 | 0.958 |
| N = 187 |  |  |  |  |  |  |  |  |
| **5HT1A_ Resting-** | *rs* | 0.010 | 0.140 | -0.150 | -0.160 | -0.070 | -0.030 | -0.040 |
| **State 3_Left** | *p* | 0.933 | 0.112 | 0.093 | 0.078 | 0.471 | 0.761 | 0.737 |
| **5HT1A_ Resting-** | *rs* | -0.100 | -0.090 | -0.070 | -0.100 | 0.030 | -0.010 | -0.040 |
| **State 3_Right** | *p* | 0.333 | 0.374 | 0.471 | 0.333 | 0.756 | 0.938 | 0.737 |
| N = 173 |  |  |  |  |  |  |  |  |
| **D1_ Resting-** | *rs* | 0.060 | 0.040 | 0.030 | 0.030 | 0.060 | -0.040 | 0.010 |
| **State 1_Left** | *p* | 0.573 | 0.664 | 0.664 | 0.664 | 0.571 | 0.664 | 0.847 |
| N = 204 |  |  |  |  |  |  |  |  |
| **D1_ Resting-** | *rs* | 0.060 | -0.020 | -0.070 | -0.080 | 0.000 | -0.080 | 0.010 |
| **State 2_Left** | *p* | 0.500 | 0.875 | 0.409 | 0.378 | 0.992 | 0.378 | 0.929 |
| N = 200 |  |  |  |  |  |  |  |  |
| **D1_ Resting-** | *rs* | -0.040 | 0.140 | -0.020 | -0.030 | 0.090 | -0.050 | 0.010 |
| **State 3_Left** | *p* | 0.729 | 0.103 | 0.890 | 0.745 | 0.329 | 0.714 | 0.890 |
| N = 183 |  |  |  |  |  |  |  |  |
| **DAT_ Resting-** | *rs* | 0.030 | 0.010 | 0.020 | -0.020 | 0.080 | 0.020 | 0.080 |
| **State 1_Left** | *p* | 0.817 | 0.884 | 0.817 | 0.864 | 0.392 | 0.817 | 0.392 |
| N = 180 |  |  |  |  |  |  |  |  |
| **DAT_ Resting-** | *rs* | 0.010 | -0.030 | -0.080 | -0.070 | 0.000 | -0.130 | -0.020 |
| **State 2_Left** | *p* | 0.929 | 0.805 | 0.388 | 0.435 | 0.969 | 0.135 | 0.853 |
| N = 181 |  |  |  |  |  |  |  |  |
| **DAT_ Resting-** | *rs* | -0.180 * | 0.040 | 0.030 | 0.030 | 0.080 | 0.030 | -0.060 |
| **State 3_Left** | *p* | 0.048 | 0.707 | 0.778 | 0.778 | 0.494 | 0.778 | 0.613 |
| N = 156 |  |  |  |  |  |  |  |  |

To simplify, only names of neurotransmitters were listed to indicate the gradient-neurotransmitter similarity. The similarity

between 5HT1A and the third-order gradient maps, D1 and the second-order gradient maps, DAT and the fourth-order

gradient maps were included to correlate with mental health outcomes. * *p*<0.05.

Table S7. Spearman correlations between gradient-neurotransmitter similarity and mental

health outcomes in MIND-Set

|  |  | **Anxiety Sensitivity** | **Depressive Severity** | **Comorbidity** | **Childhood**  **Trauma** | **Emotional**  **Neglect** | **Psychological Abuse** | **Physical**  **Abuse** |
| --- | --- | --- | --- | --- | --- | --- | --- | --- |
| **5HT1A_ Resting-** | *rs* | -0.050 | 0.030 | 0.050 | -0.050 | -0.050 | 0.010 | -0.090 |
| **State 1_Left** | *p* | 0.498 | 0.674 | 0.510 | 0.513 | 0.500 | 0.913 | 0.218 |
| **5HT1A_ Resting-** | *rs* | 0.150 * | 0.130 | 0.070 | -0.080 | -0.070 | -0.050 | -0.060 |
| **State 1_Right** | *p* | 0.038 | 0.057 | 0.400 | 0.288 | 0.360 | 0.510 | 0.401 |
| N = 237 |  |  |  |  |  |  |  |  |
| **5HT1A_ Resting-** | *rs* | 0.060 | -0.040 | 0.010 | 0.020 | 0.040 | 0.030 | 0.040 |
| **State 2_Left** | *p* | 0.421 | 0.555 | 0.860 | 0.735 | 0.555 | 0.669 | 0.555 |
| N = 261 |  |  |  |  |  |  |  |  |
| **5HT1A_ Resting-** | *rs* | -0.010 | 0.020 | 0.070 | 0.050 | 0.070 | 0.050 | -0.030 |
| **State 3_Left** | *p* | 0.909 | 0.875 | 0.400 | 0.652 | 0.380 | 0.652 | 0.736 |
| **5HT1A_ Resting-** | *rs* | 0.090 | 0.080 | -0.010 | -0.010 | -0.040 | 0.010 | 0.020 |
| **State 3_Right** | *p* | 0.255 | 0.349 | 0.896 | 0.924 | 0.736 | 0.909 | 0.875 |
| N = 236 |  |  |  |  |  |  |  |  |
| **D2_ Resting-** | *rs* | -0.020 | 0.030 | 0.030 | 0.010 | 0.020 | 0.050 | -0.060 |
| **State 1_Left** | *p* | 0.821 | 0.767 | 0.767 | 0.876 | 0.833 | 0.544 | 0.371 |
| N = 266 |  |  |  |  |  |  |  |  |
| **D2_ Resting-** | *rs* | -0.010 | -0.040 | 0.040 | 0.050 | 0.100 | 0.050 | 0.040 |
| **State 2_Left** | *p* | 0.862 | 0.513 | 0.513 | 0.495 | 0.149 | 0.513 | 0.513 |
| N = 261 |  |  |  |  |  |  |  |  |
| **D2_ Resting-** | *rs* | 0.030 | 0.080 | 0.070 | 0.070 | 0.080 | 0.070 | 0.060 |
| **State 3_Left** | *p* | 0.594 | 0.238 | 0.252 | 0.258 | 0.242 | 0.275 | 0.355 |
| N = 278 |  |  |  |  |  |  |  |  |
| **D1_ Resting-** | *rs* | 0.000 | 0.020 | -0.040 | -0.010 | -0.070 | 0.030 | 0.020 |
| **State 1_Left** | *p* | 0.973 | 0.849 | 0.557 | 0.882 | 0.350 | 0.785 | 0.849 |
| N = 279 |  |  |  |  |  |  |  |  |
| **D1_ Resting-** | *rs* | 0.130 * | 0.090 | 0.050 | 0.030 | 0.040 | 0.040 | 0.010 |
| **State 2_Left** | *p* | 0.046 | 0.172 | 0.485 | 0.701 | 0.529 | 0.592 | 0.922 |
| N = 272 |  |  |  |  |  |  |  |  |
| **D1_ Resting-** | *rs* | 0.090 | 0.070 | -0.060 | 0.080 | 0.080 | 0.060 | 0.020 |
| **State 3_Left** | *p* | 0.150 | 0.244 | 0.334 | 0.244 | 0.197 | 0.340 | 0.742 |
| N = 278 |  |  |  |  |  |  |  |  |

To simplify, only names of neurotransmitters were listed to indicate the gradient-neurotransmitter similarity. The similarity

between 5HT1A and the third-order gradient maps, D2 and the third-order gradient maps, D1 and the second-order

gradient maps were included to correlate with mental health outcomes. * *p*<0.05.

Table S8. Spearman correlations between gradient-neurotransmitter similarity and mental health

outcomes in MIND-Set, separately for patients and healthy controls

|  |  | **Anxiety Sensitivity** | **Depressive Severity** | **Comorbidity** | **Childhood**  **Trauma** | **Emotional**  **Neglect** | **Psychological Abuse** | **Physical**  **Abuse** |
| --- | --- | --- | --- | --- | --- | --- | --- | --- |
| **5HT1A_ Resting-** | *rs* | -0.080 | -0.010 | 0.030 | -0.090 | -0.100 | -0.020 | -0.130 |
| **State 1_Left_patient** | *p* | 0.363 | 0.862 | 0.803 | 0.332 | 0.280 | 0.803 | 0.117 |
| **5HT1A_ Resting-** | *rs* | 0.180 | 0.150 | 0.020 | -0.140 | -0.120 | -0.090 | -0.090 |
| **State 1_Right_patient** | *p* | 0.063 | 0.083 | 0.803 | 0.100 | 0.183 | 0.332 | 0.316 |
| N = 178 |  |  |  |  |  |  |  |  |
| **5HT1A_ Resting-** | *rs* | 0.100 | -0.060 | 0.060 | 0.070 | 0.060 | 0.070 | 0.090 |
| **State 2_Left_patient** | *p* | 0.195 | 0.423 | 0.423 | 0.367 | 0.423 | 0.402 | 0.284 |
| N = 196 |  |  |  |  |  |  |  |  |
| **5HT1A_ Resting-** | *rs* | -0.050 | -0.060 | 0.020 | -0.030 | 0.020 | -0.010 | -0.110 |
| **State 3_Left_patient** | *p* | 0.643 | 0.586 | 0.828 | 0.826 | 0.826 | 0.910 | 0.238 |
| **5HT1A_ Resting-** | *rs* | 0.100 | 0.100 | -0.030 | -0.030 | -0.060 | 0.000 | 0.040 |
| **State 3_Right_patient** | *p* | 0.286 | 0.260 | 0.826 | 0.826 | 0.608 | 0.968 | 0.736 |
| N = 177 |  |  |  |  |  |  |  |  |
| **D2_ Resting-** | *rs* | -0.040 | -0.010 | 0.010 | -0.030 | -0.050 | 0.010 | -0.100 |
| **State 1_Left_patient** | *p* | 0.697 | 0.903 | 0.903 | 0.705 | 0.643 | 0.903 | 0.230 |
| N = 197 |  |  |  |  |  |  |  |  |
| **D2_ Resting-** | *rs* | 0.000 | -0.120 | 0.060 | 0.110 | 0.110 | 0.100 | 0.090 |
| **State 2_Left_patient** | *p* | 0.976 | 0.136 | 0.382 | 0.139 | 0.139 | 0.182 | 0.203 |
| N = 196 |  |  |  |  |  |  |  |  |
| **D2_ Resting-** | *rs* | -0.020 | 0.020 | -0.010 | 0.020 | 0.040 | 0.020 | 0.000 |
| **State 3_Left_patient** | *p* | 0.884 | 0.884 | 0.915 | 0.884 | 0.716 | 0.884 | 0.978 |
| N = 207 |  |  |  |  |  |  |  |  |
| **D1_ Resting-** | *rs* | 0.020 | 0.070 | -0.040 | 0.010 | -0.070 | 0.060 | 0.010 |
| **State 1_Left_patient** | *p* | 0.778 | 0.404 | 0.669 | 0.869 | 0.367 | 0.428 | 0.869 |
| N = 210 |  |  |  |  |  |  |  |  |
| **D1_ Resting-** | *rs* | 0.140 | 0.090 | 0.010 | 0.060 | 0.060 | 0.080 | 0.030 |
| **State 2_Left_patient** | *p* | 0.067 | 0.254 | 0.896 | 0.439 | 0.439 | 0.268 | 0.671 |
| N = 205 |  |  |  |  |  |  |  |  |
| **D1_ Resting-** | *rs* | 0.160 * | 0.130 | -0.110 | 0.080 | 0.090 | 0.080 | -0.020 |
| **State 3_Left_patient** | *p* | 0.027 | 0.079 | 0.148 | 0.288 | 0.239 | 0.260 | 0.807 |
| N = 208 |  |  |  |  |  |  |  |  |
| **5HT1A_ Resting-** | *rs* | -0.040 | 0.090 | 0.000 | 0.020 | 0.090 | 0.060 | 0.060 |
| **State1_Left_healthy control** | *p* | 0.934 | 0.891 | 1.000 | 0.960 | 0.891 | 0.891 | 0.891 |
| **5HT1A_ Resting-** | *rs* | -0.030 | -0.020 | 0.050 | 0.070 | 0.010 | 0.050 | 0.020 |
| **State1_Right_healthy control** | *p* | 0.949 | 0.960 | 0.892 | 0.891 | 0.961 | 0.892 | 0.960 |
| N = 59 |  |  |  |  |  |  |  |  |
| **5HT1A_ Resting-** | *rs* | -0.020 | 0.130 | -0.050 | -0.150 | 0.030 | -0.060 | -0.150 |
| **State2_Left_healthy control** | *p* | 0.850 | 0.720 | 0.795 | 0.632 | 0.842 | 0.795 | 0.632 |
| N = 65 |  |  |  |  |  |  |  |  |
| **5HT1A_ Resting-** | *rs* | -0.030 | 0.020 | 0.000 | 0.270 | 0.250 | 0.200 | 0.220 |
| **State3_Left_healthy control** | *p* | 0.912 | 0.935 | 1.000 | 0.188 | 0.220 | 0.310 | 0.310 |
| **5HT1A_ Resting-** | *rs* | 0.120 | 0.150 | -0.220 | 0.090 | 0.060 | 0.010 | -0.050 |
| **State3_Right_healthy control** | *p* | 0.579 | 0.432 | 0.310 | 0.732 | 0.854 | 0.963 | 0.871 |
| N = 59 |  |  |  |  |  |  |  |  |
| **D2_ Resting-** | *rs* | 0.070 | 0.120 | 0.020 | 0.110 | 0.270 | 0.170 | 0.080 |
| **State1_Left_healthy control** | *p* | 0.646 | 0.600 | 0.886 | 0.600 | 0.092 | 0.383 | 0.646 |
| N = 68 |  |  |  |  |  |  |  |  |
| **D2_ Resting-** | *rs* | -0.070 | 0.120 | -0.130 | -0.230 | 0.030 | -0.160 | -0.200 |
| **State2_Left_healthy control** | *p* | 0.674 | 0.662 | 0.662 | 0.232 | 0.821 | 0.565 | 0.335 |
| N = 65 |  |  |  |  |  |  |  |  |
| **D2_ Resting-** | *rs* | -0.020 | 0.010 | 0.160 | 0.190 | 0.150 | 0.170 | 0.250 |
| **State3_Left_healthy control** | *p* | 0.917 | 0.937 | 0.355 | 0.322 | 0.371 | 0.355 | 0.124 |
| N = 71 |  |  |  |  |  |  |  |  |
| **D1_ Resting-** | *rs* | -0.090 | 0.020 | -0.070 | -0.080 | 0.010 | -0.090 | 0.090 |
| **State1_Left_healthy control** | *p* | 0.638 | 0.929 | 0.638 | 0.638 | 0.963 | 0.638 | 0.638 |
| N = 69 |  |  |  |  |  |  |  |  |
| **D1_ Resting-** | *rs* | -0.050 | -0.110 | 0.000 | -0.140 | -0.060 | -0.180 | -0.140 |
| **State2_Left_healthy control** | *p* | 0.734 | 0.556 | 1.000 | 0.478 | 0.709 | 0.361 | 0.478 |
| N = 67 |  |  |  |  |  |  |  |  |
| **D1_ Resting-** | *rs* | -0.130 | -0.040 | -0.050 | 0.090 | 0.110 | -0.020 | 0.170 |
| **State3_Left_healthy control** | *p* | 0.523 | 0.784 | 0.727 | 0.641 | 0.589 | 0.873 | 0.385 |
| N = 70 |  |  |  |  |  |  |  |  |

To simplify, only names of neurotransmitters were listed to indicate the gradient-neurotransmitter similarity. The similarity

between 5HT1A and the third-order gradient maps, D2 and the third-order gradient maps, D1 and the second-order gradient

maps were included to correlate with mental health outcomes. * *p*<0.05.


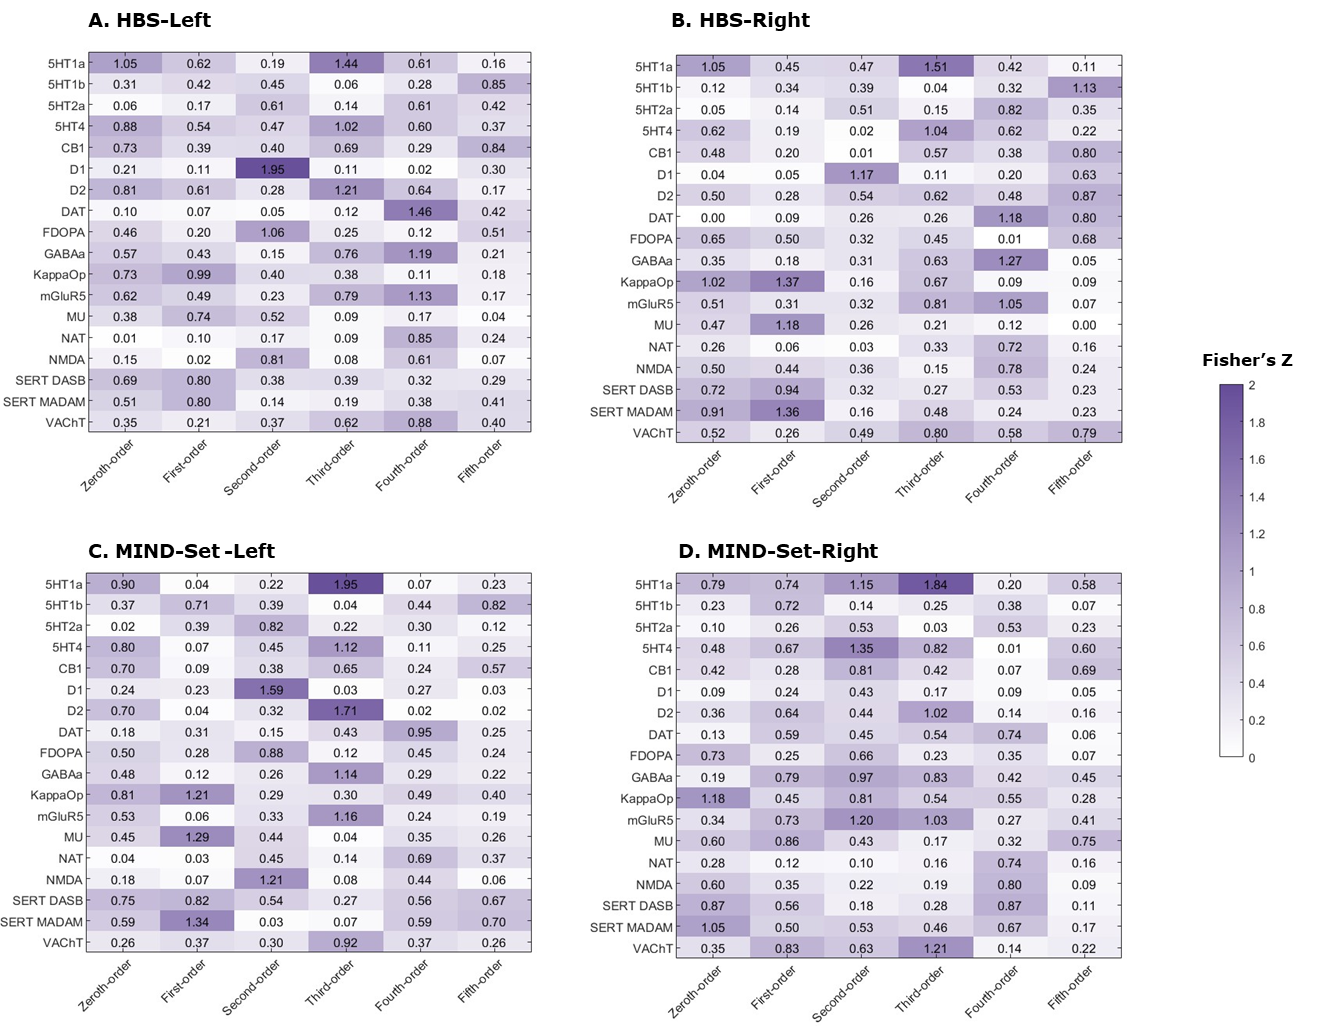


Figure S1. Heat maps for correlations coefficients (Fisher r-to-z transformed, absolute values) between gradient and neurotransmitter layouts, taking the resting-state 1 for each dataset as an example.

**References**

1 Savli M, Bauer A, Mitterhauser M, Ding Y-S, Hahn A, Kroll T *et al.* Normative database of the serotonergic system in healthy subjects using multi-tracer PET. *Neuroimage* 2012; 63: 447–459.

2 Beliveau V, Ganz M, Feng L, Ozenne B, Højgaard L, Fisher PM *et al.* A high-resolution in vivo atlas of the human brain’s serotonin system. *Journal of Neuroscience* 2017; 37: 120–128.

3 Fazio P, Schain M, Varnäs K, Halldin C, Farde L, Varrone A. Mapping the distribution of serotonin transporter in the human brainstem with high-resolution PET: validation using postmortem autoradiography data. *Neuroimage* 2016; 133: 313–320.

4 Kaller S, Rullmann M, Patt M, Becker G-A, Luthardt J, Girbardt J *et al.* Test–retest measurements of dopamine d 1-type receptors using simultaneous pet/mri imaging. *European journal of nuclear medicine and molecular imaging* 2017; 44: 1025–1032.

5 Alakurtti K, Johansson JJ, Joutsa J, Laine M, Bäckman L, Nyberg L *et al.* Long-term test–retest reliability of striatal and extrastriatal dopamine D2/3 receptor binding: study with [11C] raclopride and high-resolution PET. *Journal of Cerebral Blood Flow & Metabolism* 2015; 35: 1199–1205.

6 Dukart J, Holiga Š, Chatham C, Hawkins P, Forsyth A, McMillan R *et al.* Cerebral blood flow predicts differential neurotransmitter activity. *Scientific reports* 2018; 8: 4074.

7 Gómez FJG, Huertas I, Ramírez JAL, Solís DG. Elaboración de una plantilla de SPM para la normalización de imágenes de PET con 18F-DOPA. *Imagen Diagnóstica* 2018; 9: 23–25.

8 Shokri‐Kojori E, Naganawa M, Ramchandani VA, Wong DF, Wang G, Volkow ND. Brain opioid segments and striatal patterns of dopamine release induced by naloxone and morphine. *Human brain mapping* 2022; 43: 1419–1430.

9 Kantonen T, Karjalainen T, Isojärvi J, Nuutila P, Tuisku J, Rinne J *et al.* Interindividual variability and lateralization of μ-opioid receptors in the human brain. *Neuroimage* 2020; 217: 116922.

10 DuBois JM, Rousset OG, Rowley J, Porras-Betancourt M, Reader AJ, Labbe A *et al.* Characterization of age/sex and the regional distribution of mglur5 availability in the healthy human brain measured by high-resolution [11 c] abp688 pet. *European journal of nuclear medicine and molecular imaging* 2016; 43: 152–162.

11 Laurikainen H, Tuominen L, Tikka M, Merisaari H, Armio R-L, Sormunen E *et al.* Sex difference in brain CB1 receptor availability in man. *Neuroimage* 2019; 184: 834–842.

12 Hesse S, Becker G-A, Rullmann M, Bresch A, Luthardt J, Hankir MK *et al.* Central noradrenaline transporter availability in highly obese, non-depressed individuals. *European journal of nuclear medicine and molecular imaging* 2017; 44: 1056–1064.

13 Galovic M, Erlandsson K, Fryer TD, Hong YT, Manavaki R, Sari H *et al.* Validation of a combined image derived input function and venous sampling approach for the quantification of [18F] GE-179 PET binding in the brain. *Neuroimage* 2021; 237: 118194.

14 Hansen JY, Shafiei G, Markello RD, Smart K, Cox SM, Nørgaard M *et al.* Mapping neurotransmitter systems to the structural and functional organization of the human neocortex. *Nature neuroscience* 2022; 25: 1569–1581.
